# Supplementary material
Source: MDPI journal article supplement (https://www.mdpi.com/2311-7524/8/12/1216)
Supplement: s1 [file s1 › horticulturae-2070215-supplementary.pdf]

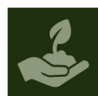

## Supplementary Materials

**Table S1.** Identified phenolic compounds in different solvents.

| Phenolic compounds                 | Extraction solvents |               |          |         |
|------------------------------------|---------------------|---------------|----------|---------|
|                                    | Water               | Ethyl acetate | Methanol | Ethanol |
| Gallic acid                        | √                   | √             | √        | -       |
| Protocatechuic acid                | -                   | -             | √        | -       |
| Chlorogenic acid                   | √                   | -             | √        | √       |
| Protocatechuic aldehyde            | √                   | √             | √        | -       |
| Caffeic acid                       | -                   | √             | √        | √       |
| Vanillic acid                      | -                   | -             | -        | -       |
| <i>p</i> -Coumaric acid            | √                   | √             | √        | √       |
| Vanillin                           | √                   | -             | -        | -       |
| Sinapic acid                       | √                   | √             | -        | -       |
| Ferulic acid                       | √                   | √             | -        | -       |
| Number of compounds in the extract | 7                   | 6             | 6        | 4       |
